# Supplementary material
Source: ML conference proceedings conference paper supplement (https://aclanthology.org/D18-1402)
Supplement: Attachment [file 2018_Stab_Cross-topic_argument_mining_appendix.pdf › 2018_Stab_Cross-topic_argument_mining_appendix.pdf]

# Cross-topic Argument Mining from Heterogeneous Sources (Appendices)

**Christian Stab<sup>\*</sup>** and **Tristan Miller<sup>\*†</sup>** and **Benjamin Schiller<sup>\*</sup>** and  
**Pranav Rai<sup>\*</sup>** and **Iryna Gurevych<sup>\*†</sup>**

<sup>\*</sup>Ubiquitous Knowledge Processing Lab (UKP-TUDA)  
Department of Computer Science, Technische Universität Darmstadt  
<https://www.ukp.tu-darmstadt.de/>

<sup>†</sup>Research Training Group AIPHES  
Department of Computer Science, Technische Universität Darmstadt  
<https://www.aiphes.tu-darmstadt.de/>

## A Hyperparameters for models after tuning

To find the best model configurations, we tuned the hyperparameters by training each model on the training data for all topics and evaluated their performance on all validation sets. In particular, we experimented with LSTM sizes of 32, 64, and 96; dropouts (Srivastava et al., 2014) of 0.3 and 0.7; batch sizes of 16, 64, and 96; and learning rates of  $1 \times 10^{-3}$  and  $1 \times 10^{-4}$ . Table 5 shows the best parameters for each of our neural networks on the validation data.

## B Full results on test set

Tables 6 and 7 show detailed two- and three-label results for each of the eight topics: abortion (AB), cloning (CL), death penalty (DP), gun control (GC), marijuana legalization (ML), minimum wage (MW), nuclear energy (NE), and school uniforms (SU). The highest score in each column is set in boldface.

| model(s)                                                                                   | LSTM size | dropout | batch size | learning rate      |
|--------------------------------------------------------------------------------------------|-----------|---------|------------|--------------------|
| tr+bilstm+dip2016,<br>tr+biclstm+dip2016,<br>mtl+outer-att+dip2016,<br>mtl+biclstm+semeval | 96        | 0.7     | 16         | $1 \times 10^{-3}$ |
| tr+outer-att+semeval                                                                       | 64        | 0.3     | 16         | $1 \times 10^{-4}$ |
| mtl+biclstm+dip2016,<br>mtl+outer-att+semeval                                              | 64        | 0.3     | 16         | $1 \times 10^{-3}$ |
| bilstm,<br>outer-att,<br>biclstm, mtl+bilstm+semeval                                       | 64        | 0.7     | 16         | $1 \times 10^{-3}$ |
| tr+bilstm+semeval                                                                          | 32        | 0.7     | 16         | $1 \times 10^{-4}$ |
| tr+outer-att+dip2016,<br>tr+biclstm+semeval,<br>mtl+bilstm+dip2016                         | 32        | 0.7     | 16         | $1 \times 10^{-3}$ |

Table 5: Hyperparameters for each model.

| model                 | GC           | NE           | MW           | AB           | DP           | CL           | SU           | ML           |
|-----------------------|--------------|--------------|--------------|--------------|--------------|--------------|--------------|--------------|
| bilstm                | .7116        | .5722        | .4789        | .5763        | .6664        | .7057        | .5368        | .6074        |
| lr-uni                | .6110        | .6080        | .5495        | .5132        | .6229        | .6532        | .5426        | .5829        |
| outer-att             | .5594        | .5905        | .4988        | .6053        | .6616        | .7179        | .7049        | .6315        |
| biclstm               | .5811        | .6348        | .6945        | .5948        | .5945        | .6626        | .6356        | .7332        |
| trl+bilstm+semeval    | <b>.7177</b> | .5848        | .5618        | .6443        | .6738        | .7207        | .5390        | .5959        |
| trl+outer-att+semeval | .7113        | .5829        | .6093        | .6325        | <b>.6743</b> | .6934        | .5448        | .5860        |
| trl+biclstm+semeval   | .6253        | .6162        | .7078        | .5758        | .6010        | .6999        | .6423        | .6782        |
| trl+bilstm+dip2016    | .6874        | .5801        | .5954        | .5755        | .6576        | .6881        | .5895        | .6299        |
| trl+outer-att+dip2016 | .5507        | .6033        | .5828        | .5829        | .6520        | .4578        | .6978        | .7323        |
| trl+biclstm+dip2016   | .5132        | <b>.6618</b> | .5831        | <b>.6707</b> | .6615        | .3464        | <b>.7215</b> | .7301        |
| mtl+bilstm+semeval    | .7135        | .5800        | .5386        | .5495        | .6595        | .7088        | .5423        | .6086        |
| mtl+outer-att+semeval | .7068        | .5954        | .5271        | .5822        | .6631        | .7221        | .5468        | .6335        |
| mtl+biclstm+semeval   | .6136        | .6455        | <b>.7269</b> | .5600        | .6095        | .7084        | .6601        | .6911        |
| mtl+bilstm+dip2016    | .7136        | .5716        | .5126        | .5816        | .6696        | .7146        | .5349        | .6173        |
| mtl+outer-att+dip2016 | .7089        | .5972        | .5137        | .5848        | .6710        | <b>.7283</b> | .5763        | .6298        |
| mtl+biclstm+dip2016   | .6545        | .6542        | .6970        | .6239        | .6149        | .6820        | .6582        | <b>.7449</b> |

Table 6:  $F_1$  for each of the eight topics in two-label setup.

| model                 | GC           | NE           | MW           | AB           | DP           | CL           | SU           | ML           |
|-----------------------|--------------|--------------|--------------|--------------|--------------|--------------|--------------|--------------|
| bilstm                | .4154        | .3621        | .2863        | .3718        | .4360        | .4602        | .3452        | .3598        |
| lr-uni                | .3733        | .4146        | .3177        | .3305        | .3971        | .4727        | .3596        | .3911        |
| outer-att             | .4244        | .3896        | .2864        | .3739        | .4430        | .4582        | .3531        | .3701        |
| biclstm               | .3561        | .4336        | <b>.4593</b> | .3641        | .4089        | .4618        | .4480        | <b>.4613</b> |
| trl+bilstm+semeval    | .4106        | .3414        | .2827        | <b>.4071</b> | .4184        | <b>.4812</b> | .2978        | .3194        |
| trl+outer-att+semeval | <b>.4273</b> | .3964        | .3018        | .3997        | <b>.4502</b> | .4752        | .3337        | .3122        |
| trl+biclstm+semeval   | .3564        | .4204        | .3910        | .3373        | .4028        | .4513        | .4250        | .3779        |
| trl+bilstm+dip2016    | .3601        | .3603        | .2934        | .3642        | .4063        | .4190        | .3344        | .3650        |
| trl+outer-att+dip2016 | .3457        | .3738        | .3047        | .3437        | .3958        | .3348        | .3341        | .3182        |
| trl+biclstm+dip2016   | .3168        | .4091        | .3970        | .3716        | .3928        | .2648        | .3444        | .3795        |
| mtl+bilstm+semeval    | .4150        | .3576        | .3017        | .3679        | .4288        | .4649        | .3318        | .3445        |
| mtl+outer-att+semeval | .3491        | .3768        | .2897        | .3665        | .4335        | .4471        | .3959        | .3530        |
| mtl+biclstm+semeval   | .3448        | .4287        | .4184        | .3695        | .4023        | .4586        | <b>.4768</b> | .4183        |
| mtl+bilstm+dip2016    | .4055        | .3562        | .2928        | .3613        | .4366        | .4565        | .3469        | .3495        |
| mtl+outer-att+dip2016 | .4102        | .3780        | .2778        | .3664        | .4350        | .4684        | .3603        | .3775        |
| mtl+biclstm+dip2016   | .3758        | <b>.4385</b> | .4379        | .4003        | .4083        | .4539        | .4528        | .4604        |

Table 7:  $F_1$  for each of the eight topics in three-label setup.
